# Supplementary material for: Comparative evaluation of a laboratory-developed real-time PCR assay and RealStar® Adenovirus PCR Kit for quantitative detection of human adenovirus
Source: Springer Nature journal article supplement (doi:10.1186/s12985-018-1059-7), 2018-09-27

# (B) Heim et al.

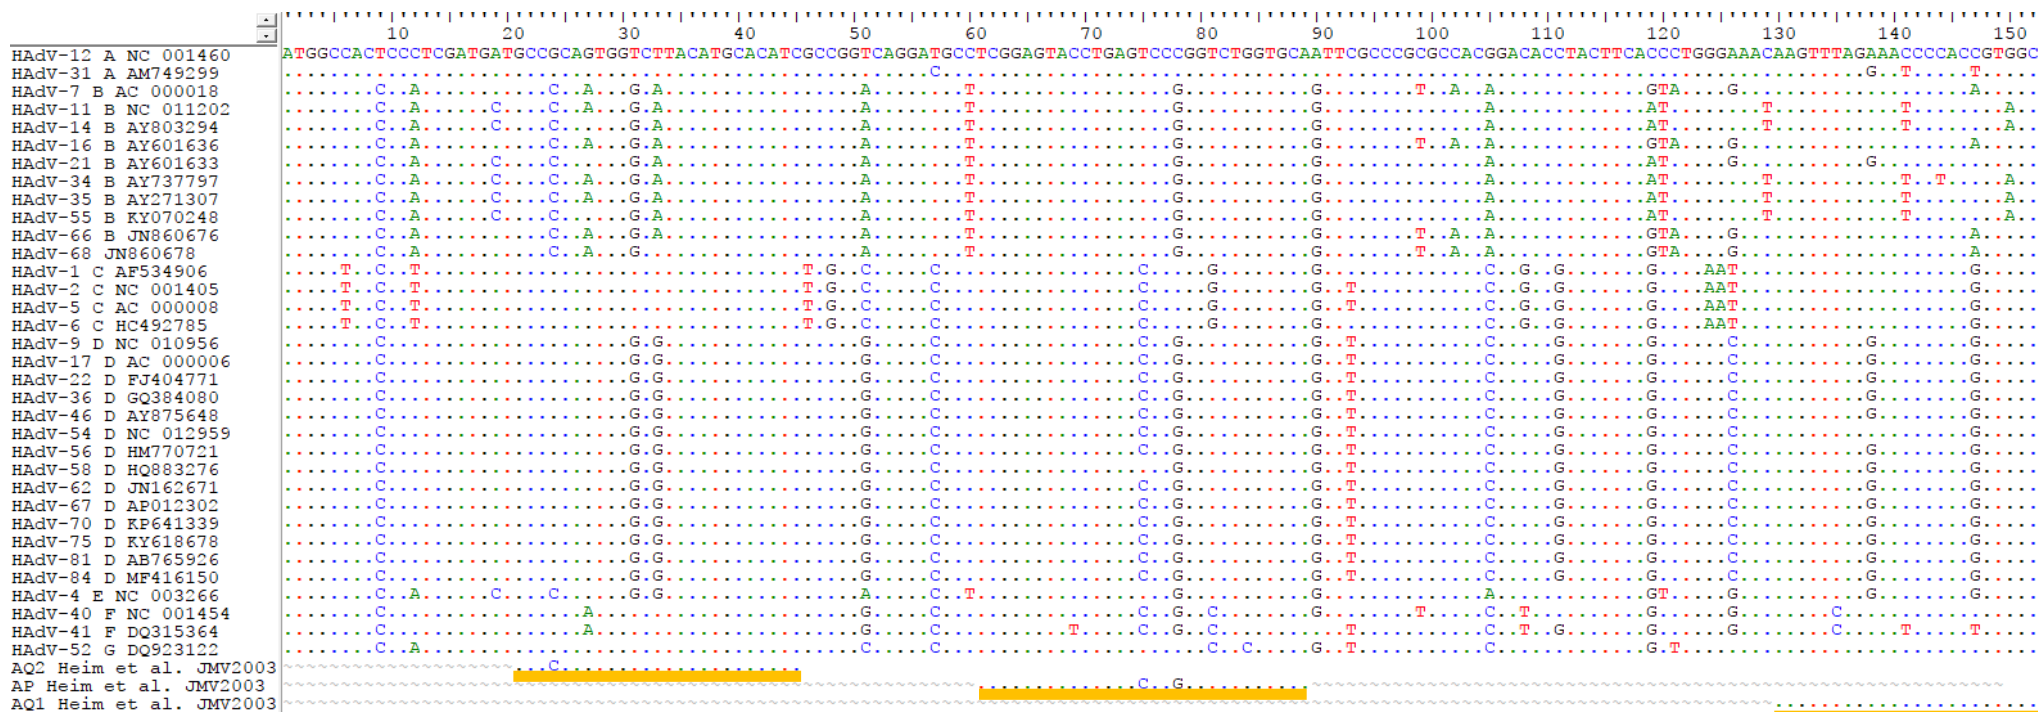

# (C) Alsaleh et al. (Mod1-PCR)

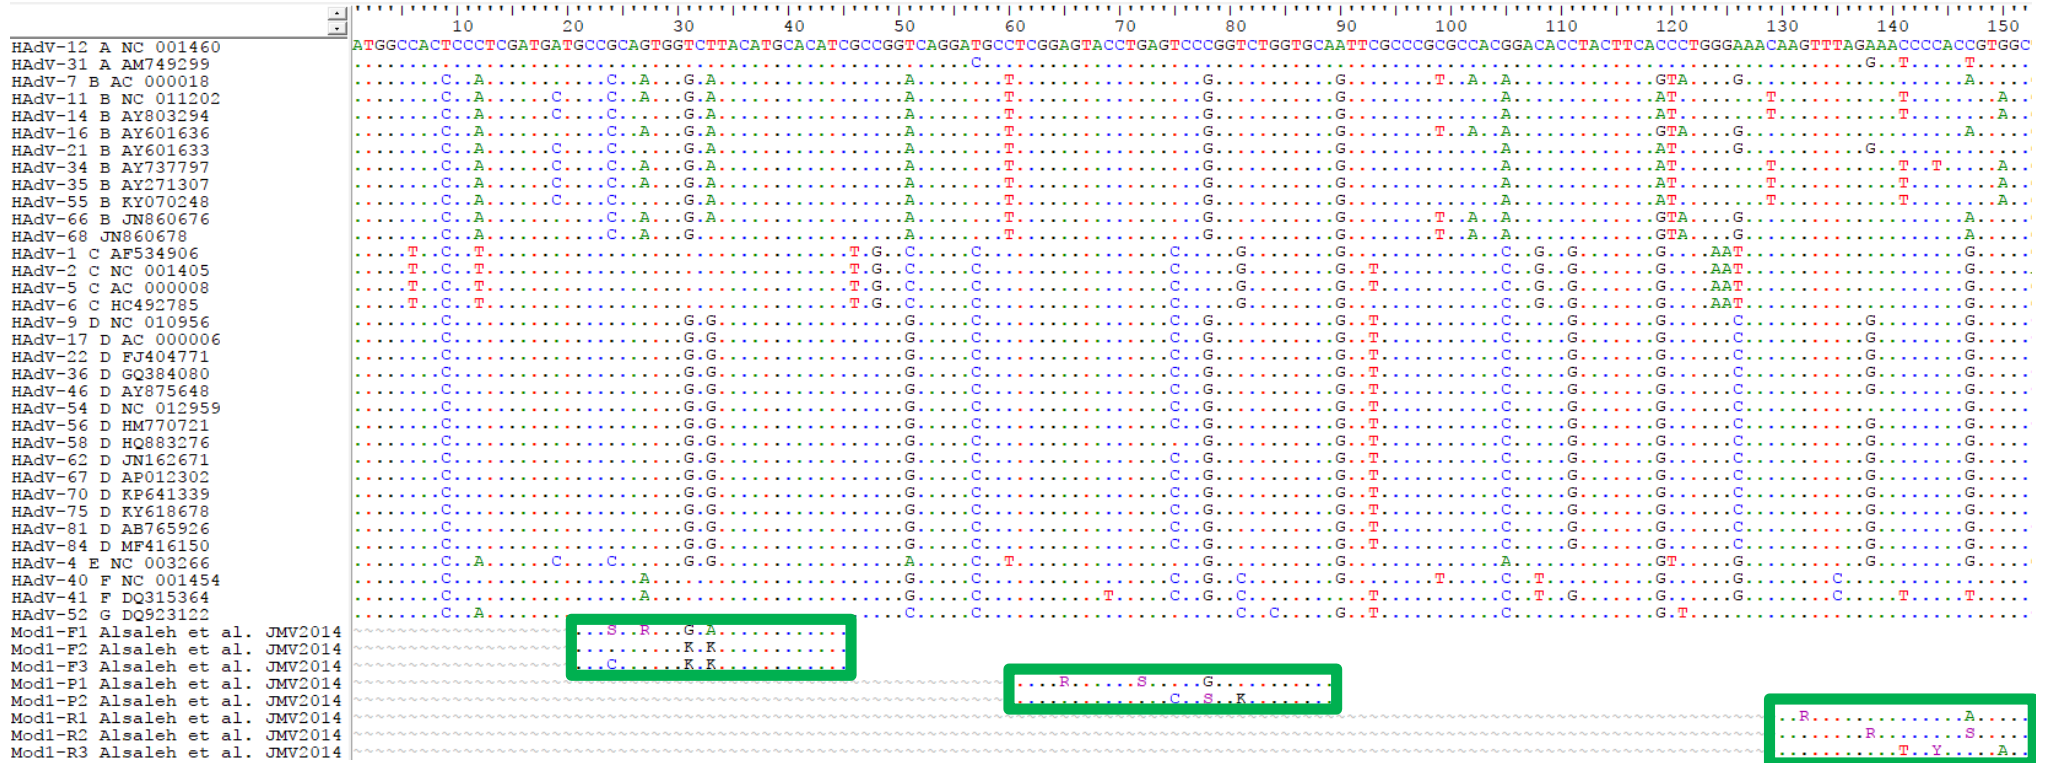

Supplement: MOESM2 [file 16157192]
